# Supplementary material for: Dynamical compensation in physiological circuits
Source: PubMed Central journal article supplement (PMC5147051; doi:10.15252/msb.20167216), 2016-11-08
Supplement: MSB-12-886-s001.pdf [file MSB-12-886-s001.pdf]

|    |                                                                                                                   |           |
|----|-------------------------------------------------------------------------------------------------------------------|-----------|
| 1  | <a href="#">Appendix “Dynamical compensation in biological circuits”</a>                                          |           |
| 2  | Omer Karin, Avital Swisa, Benjamin Glaser, Yuval Dor, Uri Alon                                                    |           |
| 3  |                                                                                                                   |           |
| 4  |                                                                                                                   |           |
| 5  | <a href="#">Table of Contents</a>                                                                                 |           |
| 6  |                                                                                                                   |           |
| 7  | <b>Section 1. Proof of DC in a general class of models.....</b>                                                   | <b>2</b>  |
| 8  | <b>Section 2. Dynamical compensation in detailed model of the glucose-insulin system.....</b>                     | <b>4</b>  |
| 9  | <b>Section 3. Ultrasensitive drop in beta cell removal around <math>G=5\text{mM}</math> enables robustness of</b> |           |
| 10 | <b>the feedback loop itself to variation in parameters.....</b>                                                   | <b>5</b>  |
| 11 | <b>Section 4. Effects of variability in endogenous glucose production rate and insulin</b>                        |           |
| 12 | <b>degradation rate on glucose dynamics.....</b>                                                                  | <b>7</b>  |
| 13 | <b>Section 5. Effects of different insulin sensitivity for hepatic and muscle tissue on glucose</b>               |           |
| 14 | <b>dynamics. ....</b>                                                                                             | <b>8</b>  |
| 15 | <b>Section 6. DC mechanism in calcium homeostasis. ....</b>                                                       | <b>9</b>  |
| 16 | <b>Section 7. Slow feedback from trophic hormone to stimulating tissue can potentially</b>                        |           |
| 17 | <b>provide DC.....</b>                                                                                            | <b>11</b> |
| 18 | <b>References.....</b>                                                                                            | <b>12</b> |
| 19 |                                                                                                                   |           |

20 Section 1. Proof of DC in a general class of models.

21 We consider a more general class of models for systems that show DC with respect to  
22 variation in the parameters  $s,p$ :

23 
$$\dot{y} = f(u, y, sx) \quad [1]$$

24 
$$\dot{x} = g(y, pZ, x) \quad [2]$$

25 
$$\dot{Z} = Z \cdot h(y) \quad [3]$$

26 An input-response curve is the dynamics of  $y(t)$  for an input  $u(t)$ , starting from a  
27 steady-state with  $u(0)=0$ . The dynamical compensation feature (DC) is defined as  
28 independence of the input-response curve from the physiological parameters  $s>0$  and  $p>0$ .

29 *Theorem 1.* The following conditions are sufficient for the system to show DC:

- 30 i. For all  $p, s$ , the system is stable at  $y = y^*$ , there exists a unique solution  $sx = x^*$  for  
31  $f(0, y^*, sx) = 0$  and there exists a unique solution  $psZ = Z^*$  for  $g(y^*, psZ, x^*) = 0$   
32 ii. A factorization condition on the function  $g$ :  $g(y, psZ, sx) = sg(y, pZ, x)$

33 *Proof.* The factorization condition (ii) is sufficient for the dynamics of the system to be  
34 independent of  $s,p$  under the transformation:  $\hat{x} = sx, \hat{Z} = psZ$ :

35 
$$\dot{y} = f(u, y, \hat{x}) \quad [4]$$

36 
$$\dot{\hat{x}} = sg(y, pZ, x) = g(y, \hat{Z}, \hat{x}) \quad [5]$$

37 
$$\dot{\hat{Z}} = \hat{Z} \cdot h(y) \quad [6]$$

38 From (i) it follows that the steady state of  $\hat{x}_{st} = sx_{st} = x^*$  is constant and that at steady state  
39  $\hat{Z}_{st} = psZ_{st}$  is constant:

$$0 = g(y^*, Z^*, x^*) = g(y_{st}, Z^*, \hat{x}_{st})$$

40 So:  $\hat{Z}_{st} = Z^*$ . Thus, the variables  $y, \hat{x}, \hat{Z}$  have the same initial conditions before and after  
41 changes in  $s,p$  and Eq. [4],[5],[6] depend only on the scaled variables. Thus, following a  
42 change in  $s,p$  the dynamics of  $y(t)$  in response to an input signal  $u(t)$  will be identical after  
43 adaptation. The system shows dynamical compensation.

44 Dynamical compensation can be extended to more complex regulatory networks.  
 45 Consider the following regulatory network, in which  $x$  passes through multiple compartments  
 46 (such a regulatory network may be relevant, for instance, for hormones such as insulin, which  
 47 passes through compartments such as the portal vein and the interstitial fluid):

$$48 \quad \dot{y} = f(u, y, sx_1, sx_2, \dots, sx_n) \quad [7]$$

$$49 \quad \dot{x}_1 = g(y, pZ) - \mu_1 x_1 \quad [8]$$

$$50 \quad \dot{x}_i = \eta_{i-1} x_{i-1} - \mu_i x_i \quad i \in \{2, \dots, n\} \quad [9]$$

$$51 \quad \dot{Z} = Z \cdot h(y) \quad [10]$$

52 Here the  $\mu_i$  coefficients describe the sum of the degradation rate  $\gamma_i$  and the transport rate  $\eta_i$ .

53 *Theorem 2.* The following conditions are sufficient for the system described by Eq. [7-10] to  
 54 show DC:

55 i. For all  $p, s$ , the system is stable at  $y = y^*$ , there exists a unique solution  $sx_1 = x^*$  for  
 56  $f(0, y^*, sx_1, \frac{\eta_1}{\mu_2} sx_1, \dots, \frac{\eta_1 \dots \eta_{n-1}}{\mu_2 \dots \mu_n} sx_1) = 0$  and there exists a unique solution  $psZ = Z^*$   
 57 for  $g(y^*, psZ) - \mu_1 x^* = 0$

58 ii. A factorization condition on the function  $g$ :  $g(y, psZ) = sg(y, pZ)$

59 *Proof.* The factorization condition (ii) is sufficient for the dynamics of the system to be  
 60 independent of  $s, p$  under the transformation:  $\hat{x}_i = sx_i, \hat{Z} = psZ$ :

$$61 \quad \dot{y} = f(u, y, \hat{x}_1, \dots, \hat{x}_n) \quad [11]$$

$$62 \quad \dot{\hat{x}}_1 = sg(y, pZ) - s\mu_1 x_1 = g(y, \hat{Z}) - \mu_1 \hat{x}_1 \quad [12]$$

$$63 \quad \dot{\hat{x}}_i = s\eta_{i-1} x_{i-1} - s\mu_i x_i = \eta_{i-1} \hat{x}_{i-1} - \mu_i \hat{x}_i \quad i \in \{2, \dots, n\} \quad [13]$$

$$64 \quad \dot{\hat{Z}} = \hat{Z} \cdot h(y) \quad [14]$$

65 At steady state  $\hat{x}_i = sx_i = \frac{\eta_1 \dots \eta_{i-1}}{\mu_2 \dots \mu_i} sx_1$ , and thus from (i) it follows that the steady state of

66  $\hat{x}_{1st} = sx_{1st} = x^*$  is constant. Thus, the steady state for each  $\hat{x}_i$  is also constant. At steady

67 state also  $\hat{Z}_{st} = psZ_{st}$  is constant:

$$0 = g(y^*, Z^*) - c_1 x^* = g(y_{st}, Z^*) - c_1 \hat{x}_{1st}$$

68 So:  $\hat{Z}_{st} = Z^*$ . The variables  $y, \hat{x}_1, \dots, \hat{x}_n, \hat{Z}$  have the same initial conditions before and after  
 69 changes in  $s, p$  and Eq. [11-14] depend only on the scaled variables. Thus, following a change  
 70 in  $s, p$  the dynamics of  $y(t)$  in response to an input signal  $u(t)$  will be identical after  
 71 adaptation and the system shows dynamical compensation.

72

### 73 Section 2. Dynamical compensation in detailed model of the glucose-insulin system.

74 Here we present the detailed meal simulation model by Dalla Man et al. (Dalla Man et  
 75 al., 2007). This model includes Eq. [1], [3-5], [10-11], [13-19], [23-27] from (Dalla Man et  
 76 al., 2007) and Eq. [8] from (Man et al., 2006). The steady state constraints for the model are  
 77 reported in Eq. [2], [6-9], [12] and [20-22] from (Dalla Man et al., 2007). The parameters for  
 78 the model are given in Table 1 in (Dalla Man et al., 2007). The model describes the dynamics  
 79 of glucose in response to a meal, and incorporates the transit of glucose through the gastro-  
 80 intestinal tract, the secretion of insulin from beta cells and the effect of insulin and glucose on  
 81 the liver and on the muscle and adipose tissues.

82 The original model did not include beta cell functional mass dynamics. We thus  
 83 added to it an equation for the dynamics of beta cell functional mass, which we denote here  
 84 as  $B$  (since the parameter  $\beta$  already exists in the model). The equation is the same as Eq. [9]  
 85 in the main text:

$$\dot{B} = B(\lambda_+(G) - \lambda_-(G)) = B \cdot h(G)$$

86 with the production and removal rates  $\lambda_+(G), \lambda_-(G)$  the same as specified in the methods  
 87 section, with adjusted units. Beta cell functional mass  $B$  determines the rate of insulin  
 88 secretion. In the detailed model, this rate is set by two constants  $\beta, K$  that determine the  
 89 responsivity of beta cells to glucose and glucose rate of change respectively. We thus  
 90 replaced them with  $B\beta, BK$ , so Eq. (25),(26) in the model become, respectively:

$$S_{po}(t) = \begin{cases} Y(t) + BK \cdot \dot{G}(t) + S_b & \text{for } \dot{G}(t) > 0 \\ Y(t) + S_b & \text{for } \dot{G}(t) \leq 0 \end{cases}$$

$$\dot{Y}(t) = \begin{cases} -\alpha \cdot [Y(t) - B\beta \cdot (G(t) - h)] & \text{if } B\beta \cdot (G(t) - h) \geq -S_b \\ -\alpha \cdot Y(t) - \alpha \cdot S_b & \text{if } B\beta \cdot (G(t) - h) < -S_b \end{cases}$$

91 We then tested whether this model has DC by simulating its meal response dynamics  
92 before and after a change in insulin sensitivity (Fig. EV1). The change in insulin sensitivity  
93 was simulated by halving the constants  $V_{mx}, k_{p3}, k_{p4}, m_5$ . The constant  $V_{mx}$  is the rate of  
94 insulin-dependent glucose utilization in remote compartments; the constants  $k_{p3}, k_{p4}$   
95 represent hepatic sensitivity to insulin and portal insulin (respectively) and  $m_5$  represents the  
96 rate of hepatic insulin extraction. We assumed here that the change in these parameters is  
97 coordinated (an uncoordinated change will be discussed in Appendix Section 4).

98 We simulated this model with a 24-hour meal input (Fig. EV1A). After the change in  
99 insulin sensitivity, the model was simulated for several months until beta cell functional mass  
100 reached its new steady state. We then compared the 24-hour dynamics of glucose (Fig.  
101 EV1B), insulin (Fig. EV1C) and insulin relative to its baseline (Fig. EV1D) before and after  
102 the change insulin sensitivity. We observe that glucose dynamics are precisely the same,  
103 indicating that adding the slow loop on beta cell functional mass provides DC to changes in  
104 insulin sensitivity.

105

106 [Section 3. Ultrasensitive drop in beta cell removal around  \$G=5\text{mM}\$  enables robustness of the](#)  
107 [feedback loop itself to variation in parameters](#)

108 We propose that the desired glucose fixed point is maintained via a switch-like drop  
109 in beta cell removal rates around  $G=G_0$ . This ultra-sensitivity has been observed  
110 experimentally in rodent beta cells (Efanova et al., 1998). Efanova et al. incubated beta cells  
111 from ob/ob mice and Wistar rats for 40 hours in different glucose concentrations. After the  
112 incubation the percentage of dead cells was measured (Fig. EV2A), showing a drop in beta

113 cell death with an apparent Hill coefficient of around 7. This switch-like drop means that for  
 114 a large range of production rates, the curves describing the rates of removal and production of  
 115 beta cells cross at the sharp drop-point of removal, keeping the steady state close to  $G=G_0$   
 116 (Fig. EV2B). Perturbing the production rate should not significantly perturb the homeostatic  
 117 set-point, yet it does affect the time it takes for the slow feedback loop to reach  
 118 compensation.

119 What is the molecular mechanism for the ultra-sensitive drop in beta cell removal?  
 120 Mild ultra-sensitivity can be provided by the glucose-sensing enzyme glucokinase (GCK)  
 121 which controls both insulin secretion and beta cell mass (Froguel et al., 1993; Glaser et al.,  
 122 1998; Porat et al., 2011; Terauchi et al., 2007). Further ultra-sensitivity may be gained by the  
 123 energy-sensing AMP-activated protein kinase (AMPK) which lies downstream of GCK, and  
 124 whose prolonged phosphorylation is associated with beta cell death and dysfunction (Fu et  
 125 al., 2013).

126 Prolonged phosphorylation of AMPK causes beta cell death and dysfunction in cell  
 127 lines (Kefas et al., 2003a; da SILVA XAVIER et al., 2003; Van de Castele et al., 2003;  
 128 Zhang et al., 2009) and primary beta cells and islets (Cai et al., 2007, 2008; Kefas et al.,  
 129 2003b; Leclerc et al., 2004; Targonsky et al., 2006). Over-expression of AMPK causes beta  
 130 cell death and dysfunction in vivo (Richards et al., 2005) (see review by Fu et al (Fu et al.,  
 131 2013)). AMPK is activated by an increase in the ratio of AMP:ATP, which varies  
 132 approximately as the square of the ratio ADP:ATP (Hardie et al., 1999). AMPK activation by  
 133 AMP:ATP is cooperative with an apparent Hill coefficient of about  $n_1=2.5\pm 0.5$  (Hardie et al.,  
 134 1999) and half-maximal activation  $K_1\approx 0.13$  (Hardie et al., 1999). Thus:

$$135 \quad AMPK^P \approx \rho \frac{1}{1 + \left(\frac{K_1}{AMP:ATP}\right)^{n_1}} \approx \rho \frac{1}{1 + K_1^{n_1} (ATP:ADP)^{2n_1}} \quad [1]$$

136 The rate-limiting step in the production of ATP in beta cells is the phosphorylation of  
 137 glucose by glucokinase, which occurs with an apparent Hill coefficient of about  $n_2=1.7$

138 (Matschinsky et al., 1998) and half way point  $K_2=8.4\text{mM}$  (Matschinsky et al., 1998). Thus,  
 139 the ATP:ADP ratio in the cell as a function of glucose can be approximated by the equation:

$$140 \quad ATP:ADP \approx \mu \frac{1}{1+\left(\frac{K_2}{G}\right)^{n_2}} \quad [2]$$

141 Combining [1],[2] we get:

$$142 \quad AMPK^P \approx \rho \frac{1}{1+K_1^{n_1} \mu^{2n_1} \left(1+\left(\frac{K_2}{G}\right)^{n_2}\right)^{-2n_1}} \quad [3]$$

143 This equation implies that the activation of AMPK as a function of glucose is similar  
 144 to a Hill function with a Hill coefficient of about  $n=1.7 \cdot 5=8.5 \pm 1.7$ . The half maximal  
 145 activation of AMPK is determined by the constants  $K_1, K_2$  as well as by  $\mu$ . The parameter  $\mu$   
 146 determines the ATP:ADP level as a function glucose, which is coupled to glucose stimulated  
 147 insulin secretion (Maechler et al., 2006). By approximating  $\mu \approx 10$  from maximal glucose  
 148 stimulated ATP:ADP production (Nilsson et al., 1996) we get a half maximal activation of  
 149  $G \approx 5\text{mM}$ . Thus, the robustness of AMPK activation around  $G=5\text{mM}$  depends on the  
 150 robustness of  $\mu$ , the maximal ATP:ADP ratio in the cell. Indeed, in mouse islets incubated at  
 151 different glucose concentrations, AMPK is activated in a switch like manner around 5mM  
 152 glucose, with an apparent Hill coefficient of at least 6 (Fu et al., 2009).

153 In order to determine hill coefficients for AMPK phosphorylation (Fu et al., 2009) and beta  
 154 cell death (Efanova et al., 1998) as a function of glucose, we fitted the Hill function:

$$155 \quad \frac{1-B}{1+\left(\frac{G}{K}\right)^n} + B, \text{ where } G \text{ is glucose concnetration. We estimated the parameters } B, K, n \text{ by least-}$$

156 square estimates using the nls function of R.

157

158 [Section 4. Effects of variability in endogenous glucose production rate and insulin](#)  
 159 [degradation rate on glucose dynamics.](#)

160 While the glucose dynamics presented in Eq. [7-9] in the main text have DC with  
 161 respect to changes in insulin sensitivity ( $S_i$ ) and insulin secretion ( $p$ ), they do not have DC  
 162 with respect to changes in insulin degradation ( $\gamma$ ) and endogenous glucose production ( $u_0$ ).  
 163 To show this, we compared the simulated glucose dynamics in response to the same meal  
 164 intake by individuals with diminished insulin degradation ( $\gamma/8$ ), diminished endogenous  
 165 glucose production ( $u_0/2$ ) and wild-type (Fig. EV3). For each case we simulated the  
 166 dynamics after the system reached its new steady state. We observe that the dynamics of  
 167 individuals with diminished insulin degradation or diminished endogenous glucose  
 168 production are not the same as wild-type, and thus the system does not have DC with respect  
 169 to these parameters.

170

171 [Section 5. Effects of different insulin sensitivity for hepatic and muscle tissue on glucose](#)  
 172 [dynamics.](#)

173 Here we examine the effect of an uncoordinated change in hepatic versus muscle  
 174 insulin sensitivity. To do so we model glucose dynamics using a minimal model which is  
 175 based on the best-fit model presented by Dalla Man et al. (Man et al., 2008). The model  
 176 includes the suppression of hepatic glucose production by insulin:

$$\dot{G} = u_0 + u(t) - S_H I - (C + S_M I) \cdot G \quad [1]$$

177 where  $S_H$  represents hepatic insulin sensitivity and  $S_M$  represents skeletal muscle insulin  
 178 sensitivity. Because the equation for beta cell functional mass can only reach steady state at  
 179  $G=G_0$ , glucose steady state  $G_0$  does not depend on  $S_H$  and  $S_M$ . Temporal dynamics are,  
 180 however, a function of the ratio  $S_M/S_H$ . For a given ratio  $S_M/S_H=\delta$ , we can replace:  $S_M \leftarrow \delta S_H$ ,  
 181 and the general theorem in (Box 1) applies and DC is achieved but the shape of the input-  
 182 response profile depends on the ratio of the two insulin sensitivities. The response to a given



183 glucose challenge will be lower in amplitude and more rapid the higher muscle sensitivity  $S_M$   
184 is relative to hepatic sensitivity  $S_H$ .

185 This expectation matches clinical observations on the glucose response of individuals  
186 with mis-coordinated sensitivity in the two tissues: hepatic resistance and muscle sensitivity  
187 vs. muscle resistance and hepatic sensitivity to insulin (Abdul-Ghani et al., 2008) (Fig. EV4).  
188 In (Fig. EV4A) we present the results of an oral glucose tolerance test of such individuals as  
189 reported by Abdul Ghani et al. (Abdul-Ghani et al., 2008). Individuals with hepatic insulin  
190 resistance and normal muscle insulin sensitivity (in the model - high  $S_M/S_H$ ) showed a lower  
191 and more rapid glucose response than individuals with muscle insulin resistance and normal  
192 hepatic insulin sensitivity (in the model - low  $S_M/S_H$ ). These clinical observations are  
193 comparable to the glucose dynamics that are simulated using Eq. [1] (Fig. EV4B) where  
194 hepatic insulin resistance was simulated by setting  $S_H=0$  and muscle insulin resistance was  
195 simulated by setting  $S_M=0$ .

196 Interestingly, in subjects with impaired glucose metabolism, impaired glucose  
197 tolerance (IGT) is associated with muscle insulin resistance while impaired fasting glucose  
198 (IFG) is associated with hepatic insulin resistance (Abdul-Ghani et al., 2006). This is  
199 predicted by the above analysis – among individuals with insufficient insulin secretion,  
200 muscle insulin resistance can cause impaired postprandial responses even when fasting  
201 glucose is within the normal range. On the other hand, individuals with hepatic insulin  
202 resistance and insufficient insulin secretion might have high fasting glucose and still be  
203 glucose tolerant.

204

## 205 [Section 6. DC mechanism in calcium homeostasis.](#)

206 Calcium is maintained in tight homeostasis in the blood, around  $[Ca^{2+}] = 1.2\text{mM}$ .  
207 This homeostasis is maintained by the parathyroid (PT) gland, which secretes parathyroid

208 hormone (PTH). The parathyroid gland secretes PTH in response to a drop in plasma  
 209 calcium. The increase in PTH causes an increase in calcium production by the bones and an  
 210 increase in calcium reabsorption in the kidneys, as well as increased production of activated  
 211 vitamin D, which increases calcium absorption in the intestine. Calcium dynamics can be  
 212 represented using the following equations (Fig. EV5):

$$213 \quad [Ca^{2+}] = s \cdot [PTH] - (u_0 + u(t)) \cdot [Ca^{2+}] \quad [1]$$

214 where  $[Ca^{2+}]$  is the plasma calcium concentration,  $[PTH]$  is the PTH concentration,  
 215  $u_0 + u(t)$  is the calcium consumption rate and  $s$  represents the effectiveness of the  
 216 parathyroid hormone in increasing calcium production. The parameter  $s$  depends on the  
 217 response of the kidney and bone tissues to the parathyroid hormone. Secretion of PTH is a  
 218 modeled by the equation:

$$219 \quad [\dot{P}TH] = pM \cdot \rho([Ca^{2+}]) - \gamma[PTH] \quad [2]$$

220 where  $\rho([Ca^{2+}])$  is a monotonically decreasing function of calcium,  $\gamma$  is the PTH removal  
 221 rate and  $p$  is the PTH secretion per PT cell.

222 As was the case with beta cell functional mass, we assume here that the functional  
 223 mass of the parathyroid gland is chiefly controlled plasma calcium. This assumption is  
 224 supported by several experimental studies. Low calcium diet causes a 10-fold increase in PT-  
 225 cell proliferation in rodents (Naveh-Many et al., 1995), while direct activation of the calcium  
 226 receptor inhibits PT-cell proliferation (Chen, 2004; Chin et al., 2000; Wada, 2003; Wada et  
 227 al., 1997, 2000) and increases PT-cell apoptosis (Mizobuchi et al., 2007). Thus, parathyroid  
 228 mass dynamics can be modeled as follows:

$$229 \quad \dot{M} = M \cdot h([Ca^{2+}]) \quad [3]$$

230 where  $h([Ca^{2+}])$  is the net parathyroid growth rate.

231 This model has DC if  $M$  is stable at the desired set point of plasma calcium, that is, if  
 232  $h([Ca^{2+}]) = 0$  at  $Ca^{2+} \approx 1.2\text{mM}$  with a negative local slope. If this is the case, DC is

233 achieved because Eq. [1-3] satisfy the sufficient conditions for DC. Note the differences from  
234 the glucose homeostasis model: the PTH hormone causes an increase in the regulated  
235 variable whereas insulin causes a decrease; the sensitivity parameter  $s$  appears in different  
236 terms: the removal term for glucose and the production term for calcium. Despite these  
237 differences, DC can be achieved by proper feedback of the regulated variable on the mass of  
238 the regulating tissue.

239

240 [Section 7. Slow feedback from trophic hormone to stimulating tissue can potentially provide](#)  
241 [DC.](#)

242 The pituitary trophic hormones Adrenocorticotrophic hormone (ACTH) and Thyroid-  
243 Stimulating Hormone (TSH) stimulate respectively the secretion of glucocorticoids by the  
244 adrenal cortex and the secretion of thyroid hormones by the thyroid gland. They also cause  
245 respective changes in the mass dynamics of these glands (2011) which are potentially  
246 analogous to the changes in beta cell functional mass dynamics in response to blood glucose  
247 levels. Thus, the level of TSH is regulated by a slow and fast feedback from the thyroid gland  
248 and the level of ACTH is regulated by a slow and fast feedback from the adrenal cortex.

249 These circuits have various clinical implications. The pathophysiology of Thyroid  
250 Hormone Resistance Syndrome includes enlargement of the thyroid gland as well as higher  
251 thyroid hormone levels, while TSH levels are normal (Beck-Peccoz and Chatterjee, 1994). A  
252 similar pathophysiology in the ACTH-adrenal circuit occurs in Generalized Glucocorticoid  
253 Resistance (Charmandari et al., 2008). Inability to close the TSH-thyroid feedback loop (for  
254 instance, due to iodine deficiency) causes a significant enlargement of the thyroid, and the  
255 same occurs for the adrenal cortex when ACTH levels cannot be lowered (2011). On the  
256 other hand, large exogenous intake of the secreting hormone leads atrophy in the secreting  
257 gland (Selye, 1940). These features are consistent with a DC mechanism.

258 [References](#)

259

260 Abdul-Ghani, M.A., Tripathy, D., and DeFronzo, R.A. (2006). Contributions of  $\beta$ -Cell  
261 Dysfunction and Insulin Resistance to the Pathogenesis of Impaired Glucose Tolerance and  
262 Impaired Fasting Glucose. *Diabetes Care* 29, 1130–1139.

263 Abdul-Ghani, M.A., Matsuda, M., and DeFronzo, R.A. (2008). Strong association between  
264 insulin resistance in liver and skeletal muscle in non-diabetic subjects. *Diabet. Med. J. Br.*  
265 *Diabet. Assoc.* 25, 1289–1294.

266 Beck-Peccoz, P., and Chatterjee, V.K. (1994). The variable clinical phenotype in thyroid  
267 hormone resistance syndrome. *Thyroid Off. J. Am. Thyroid Assoc.* 4, 225–232.

268 Cai, Y., Martens, G.A., Hinke, S.A., Heimberg, H., Pipeleers, D., and Van de Castele, M.  
269 (2007). Increased oxygen radical formation and mitochondrial dysfunction mediate beta cell  
270 apoptosis under conditions of AMP-activated protein kinase stimulation. *Free Radic. Biol.*  
271 *Med.* 42, 64–78.

272 Cai, Y., Wang, Q., Ling, Z., Pipeleers, D., McDermott, P., Pende, M., Heimberg, H., and Van de  
273 Castele, M. (2008). Akt activation protects pancreatic beta cells from AMPK-mediated  
274 death through stimulation of mTOR. *Biochem. Pharmacol.* 75, 1981–1993.

275 Charmandari, E., Kino, T., Ichijo, T., and Chrousos, G.P. (2008). Generalized Glucocorticoid  
276 Resistance: Clinical Aspects, Molecular Mechanisms, and Implications of a Rare Genetic  
277 Disorder. *J. Clin. Endocrinol. Metab.* 93, 1563–1572.

278 Chen, R.A. (2004). Role of the calcium-sensing receptor in parathyroid gland physiology. *AJP*  
279 *Ren. Physiol.* 286, F1005–F1011.

280 Chin, J., Miller, S.C., Wada, M., Nagano, N., Nemeth, E.F., and Fox, J. (2000). Activation of  
281 the calcium receptor by a calcimimetic compound halts the progression of secondary  
282 hyperparathyroidism in uremic rats. *J. Am. Soc. Nephrol. JASN* 11, 903–911.

283 Dalla Man, C., Rizza, R.A., and Cobelli, C. (2007). Meal simulation model of the glucose-  
284 insulin system. *IEEE Trans. Biomed. Eng.* 54, 1740–1749.

285 Efanova, I.B., Zaitsev, S.V., Zhivotovsky, B., Köhler, M., Efendić, S., Orrenius, S., and  
286 Berggren, P.O. (1998). Glucose and tolbutamide induce apoptosis in pancreatic beta-cells. A  
287 process dependent on intracellular  $Ca^{2+}$  concentration. *J. Biol. Chem.* 273, 33501–33507.

288 Froguel, P., Zouali, H., Vionnet, N., Velho, G., Vaxillaire, M., Sun, F., Lesage, S., Stoffel, M.,  
289 Takeda, J., and Passa, P. (1993). Familial hyperglycemia due to mutations in glucokinase.  
290 Definition of a subtype of diabetes mellitus. *N. Engl. J. Med.* 328, 697–702.

291 Fu, A., Ng, A.C.-H., Depatie, C., Wijesekara, N., He, Y., Wang, G.-S., Bardeesy, N., Scott, F.W.,  
292 Touyz, R.M., Wheeler, M.B., et al. (2009). Loss of Lkb1 in adult beta cells increases beta cell  
293 mass and enhances glucose tolerance in mice. *Cell Metab.* 10, 285–295.

294 Fu, A., Eberhard, C.E., and Screatton, R.A. (2013). Role of AMPK in pancreatic beta cell  
295 function. *Mol. Cell. Endocrinol.* 366, 127–134.

296 Glaser, B., Kesavan, P., Heyman, M., Davis, E., Cuesta, A., Buchs, A., Stanley, C.A., Thornton,  
297 P.S., Permutt, M.A., Matschinsky, F.M., et al. (1998). Familial Hyperinsulinism Caused by an  
298 Activating Glucokinase Mutation. *N. Engl. J. Med.* 338, 226–230.

299 Hardie, D.G., Salt, I.P., Hawley, S.A., and Davies, S.P. (1999). AMP-activated protein kinase:  
300 an ultrasensitive system for monitoring cellular energy charge. *Biochem. J.* 338 ( Pt 3), 717–  
301 722.

302 Kefas, B.A., Cai, Y., Ling, Z., Heimberg, H., Hue, L., Pipeleers, D., and Van de Casteele, M.  
303 (2003a). AMP-activated protein kinase can induce apoptosis of insulin-producing MIN6 cells  
304 through stimulation of c-Jun-N-terminal kinase. *J. Mol. Endocrinol.* 30, 151–161.

305 Kefas, B.A., Heimberg, H., Vaulont, S., Meisse, D., Hue, L., Pipeleers, D., and Van de Casteele,  
306 M. (2003b). AICA-riboside induces apoptosis of pancreatic beta cells through stimulation of  
307 AMP-activated protein kinase. *Diabetologia* 46, 250–254.

308 Leclerc, I., Woltersdorf, W.W., da Silva Xavier, G., Rowe, R.L., Cross, S.E., Korbitt, G.S.,  
309 Rajotte, R.V., Smith, R., and Rutter, G.A. (2004). Metformin, but not leptin, regulates AMP-  
310 activated protein kinase in pancreatic islets: impact on glucose-stimulated insulin secretion.  
311 *Am. J. Physiol. Endocrinol. Metab.* 286, E1023–E1031.

312 Maechler, P., Carobbio, S., and Rubi, B. (2006). In beta-cells, mitochondria integrate and  
313 generate metabolic signals controlling insulin secretion. *Int. J. Biochem. Cell Biol.* 38, 696–  
314 709.

315 Man, C.D., Camilleri, M., and Cobelli, C. (2006). A System Model of Oral Glucose Absorption:  
316 Validation on Gold Standard Data. *IEEE Trans. Biomed. Eng.* 53, 2472–2478.

317 Man, C.D., Toffolo, G., Basu, R., Rizza, R.A., and Cobelli, C. (2008). Use of labeled oral  
318 minimal model to measure hepatic insulin sensitivity. *AJP Endocrinol. Metab.* 295, E1152–  
319 E1159.

320 Matschinsky, F.M., Glaser, B., and Magnuson, M.A. (1998). Pancreatic beta-cell glucokinase:  
321 closing the gap between theoretical concepts and experimental realities. *Diabetes* 47, 307–  
322 315.

323 Mizobuchi, M., Ogata, H., Hatamura, I., Saji, F., Koiwa, F., Kinugasa, E., Koshikawa, S., and  
324 Akizawa, T. (2007). Activation of calcium-sensing receptor accelerates apoptosis in  
325 hyperplastic parathyroid cells. *Biochem. Biophys. Res. Commun.* 362, 11–16.

326 Naveh-Many, T., Rahamimov, R., Livni, N., and Silver, J. (1995). Parathyroid cell proliferation  
327 in normal and chronic renal failure rats. The effects of calcium, phosphate, and vitamin D. *J.*  
328 *Clin. Invest.* 96, 1786–1793.

329 Nilsson, T., Schultz, V., Berggren, P.O., Corkey, B.E., and Tornheim, K. (1996). Temporal  
330 patterns of changes in ATP/ADP ratio, glucose 6-phosphate and cytoplasmic free Ca<sup>2+</sup> in  
331 glucose-stimulated pancreatic beta-cells. *Biochem. J.* *314 ( Pt 1)*, 91–94.

332 Porat, S., Weinberg-Corem, N., Tornovsky-Babaey, S., Schyr-Ben-Haroush, R., Hija, A.,  
333 Stolovich-Rain, M., Dadon, D., Granot, Z., Ben-Hur, V., White, P., et al. (2011). Control of  
334 pancreatic  $\beta$  cell regeneration by glucose metabolism. *Cell Metab.* *13*, 440–449.

335 Richards, S.K., Parton, L.E., Leclerc, I., Rutter, G.A., and Smith, R.M. (2005). Over-expression  
336 of AMP-activated protein kinase impairs pancreatic {beta}-cell function in vivo. *J. Endocrinol.*  
337 *187*, 225–235.

338 Selye, H. (1940). COMPENSATORY ATROPHY OF THE ADRENALS. *J. Am. Med. Assoc.* *115*,  
339 2246.

340 da SILVA XAVIER, G., Leclerc, I., Varadi, A., Tsuboi, T., Moule, S.K., and Rutter, G.A. (2003).  
341 Role for AMP-activated protein kinase in glucose-stimulated insulin secretion and  
342 preproinsulin gene expression. *Biochem. J.* *371*, 761–774.

343 Targonsky, E.D., Dai, F., Koshkin, V., Karaman, G.T., Gyulxhandanyan, A.V., Zhang, Y., Chan,  
344 C.B., and Wheeler, M.B. (2006). alpha-lipoic acid regulates AMP-activated protein kinase  
345 and inhibits insulin secretion from beta cells. *Diabetologia* *49*, 1587–1598.

346 Terauchi, Y., Takamoto, I., Kubota, N., Matsui, J., Suzuki, R., Komeda, K., Hara, A., Toyoda, Y.,  
347 Miwa, I., Aizawa, S., et al. (2007). Glucokinase and IRS-2 are required for compensatory cell  
348 hyperplasia in response to high-fat diet-induced insulin resistance. *J. Clin. Invest.* *117*, 246–  
349 257.

350 Topp, B., Promislow, K., deVries, G., Miura, R.M., and Finegood, D.T. (2000). A model of  
351 beta-cell mass, insulin, and glucose kinetics: pathways to diabetes. *J. Theor. Biol.* *206*, 605–  
352 619.

353 Van de Casteele, M., Kefas, B.A., Cai, Y., Heimberg, H., Scott, D.K., Henquin, J.C., Pipeleers,  
354 D., and Jonas, J.C. (2003). Prolonged culture in low glucose induces apoptosis of rat  
355 pancreatic beta-cells through induction of c-myc. *Biochem. Biophys. Res. Commun.* *312*,  
356 937–944.

357 Visentin, R., Dalla Man, C., Basu, R., Basu, A., Rizza, R.A., and Cobelli, C. (2015). Hepatic  
358 insulin sensitivity in healthy and prediabetic subjects: from a dual- to a single-tracer oral  
359 minimal model. *Am. J. Physiol. - Endocrinol. Metab.* *309*, E161–E167.

360 Wada, M. (2003). Control of parathyroid cell growth by calcimimetics. *Nephrol. Dial.*  
361 *Transplant.* *18*, 13iii – 17.

362 Wada, M., Furuya, Y., Sakiyama, J., Kobayashi, N., Miyata, S., Ishii, H., and Nagano, N. (1997).  
363 The calcimimetic compound NPS R-568 suppresses parathyroid cell proliferation in rats with  
364 renal insufficiency. Control of parathyroid cell growth via a calcium receptor. *J. Clin. Invest.*  
365 *100*, 2977–2983.

366 Wada, M., Nagano, N., Furuya, Y., Chin, J., Nemeth, E.F., and Fox, J. (2000). Calcimimetic NPS  
367 R-568 prevents parathyroid hyperplasia in rats with severe secondary hyperparathyroidism.  
368 *Kidney Int.* 57, 50–58.

369 Zhang, X., Sun, N., Wang, L., Guo, H., Guan, Q., Cui, B., Tian, L., Gao, L., and Zhao, J. (2009).  
370 AMP-activated protein kinase and pancreatic/duodenal homeobox-1 involved in insulin  
371 secretion under high leucine exposure in rat insulinoma beta-cells. *J. Cell. Mol. Med.* 13,  
372 758–770.

373 (2011). *Williams textbook of endocrinology* (Philadelphia, Pa: Saunders Elsevier).

374
